# Supplementary material for: Activity adaptability of a DhHP-6 peroxidase-mimic in wide pH and temperature ranges and solvent media
Source: Royal Society of Chemistry journal article supplement (doi:10.1039/c9cy01855g), 2020-01-01
Supplement: c9cy01855g1.pdf [file c9cy01855g1.pdf]

## Electronic Supplementary Information:

### Activity Adaptability of DhHP-6 Peroxidase-Mimic at Wide pH, Temperature and Solvent Medium

Jiaqing Yan<sup>a,b</sup>, Zhengqiang Li<sup>a,\*</sup>, Min Liu<sup>b</sup>, Xiaoli Sun<sup>c</sup>, Li Ma<sup>d</sup>, Zhi Wang<sup>a,\*</sup>, Zijian Zhao<sup>e,\*</sup>, Xuri Huang<sup>c</sup> and Long Yuan<sup>f,\*</sup>

<sup>a</sup> Key Laboratory for Molecular Enzymology and Engineering of Ministry of Education, College of Life Science, Jilin University, 2699 Qianjin Street, Changchun 130012, Jilin Province, China. Email: lzq@jlu.edu.cn, wangzhi@jlu.edu.cn; Tel: +86-431-85155201.

<sup>b</sup> Hospital of Stomatology, Jilin University, Qinghua Road 1500, Changchun, China.

<sup>c</sup> Institute of Theoretical Chemistry, Jilin University, Changchun 130023, China.

<sup>d</sup> Department of Physics, Georgia Southern University, Statesboro, GA 30460, USA.

<sup>e</sup> Institute of Agro-food Technology, Jilin Academy of Agricultural Sciences, Changchun, 130033, China. Email: zhaojaas@163.com.

<sup>f</sup> Key Laboratory of Functional Materials Physics and Chemistry of the Ministry of Education, College of Physics, Jilin Normal University, Changchun 130103, China. Email: yuanlong@jlnu.edu.cn.

## Content

### Tables:

|                                                                  |    |
|------------------------------------------------------------------|----|
| Table S1. Kinetic parameters of DhHP-6 in organic solvents. .... | S8 |
|------------------------------------------------------------------|----|

### Figures:

|                                                                                                                                                                                                                                                                                                                        |     |
|------------------------------------------------------------------------------------------------------------------------------------------------------------------------------------------------------------------------------------------------------------------------------------------------------------------------|-----|
| Figure S1. Time-dependent product concentration of ABTS <sup>+</sup> with various enzyme mimic as catalysts. ....                                                                                                                                                                                                      | S5  |
| Figure S2. Time-dependent product concentration of phenol oxidation with various enzyme mimic as catalysts. ....                                                                                                                                                                                                       | S6  |
| Figure S3 Time-dependent product concentration of THB oxidation with various enzyme mimics as catalysts. ....                                                                                                                                                                                                          | S7  |
| Figure S4 Steady-state kinetic assay and catalytic mechanism of DhHP-6: The concentration of H <sub>2</sub> O <sub>2</sub> is 1Mm and the phenol concentration is varied. ....                                                                                                                                         | S9  |
| Figure S5 Double reciprocal plots of peroxidase activity of DhHP-6: initial velocity against the concentration of the substrate phenol is obtained over a range of concentrations of the second substrate H <sub>2</sub> O <sub>2</sub> . All test conditions was at 25 °C in a pH 7.0 PBS (0.05 M) buffer. ....       | S10 |
| Figure S6 Double-reciprocal plots of activity of DhHP-6 and HRP at a fixed concentration of H <sub>2</sub> O <sub>2</sub> versus varying concentration of phenol. The test conditions of DhHP-6 was at 25 °C in a pH 7.0 PBS (0.05 M) buffer and the test conditions of HRP was at 25 °C in a pH 6.0 PBS (0.05 M)..... | S11 |

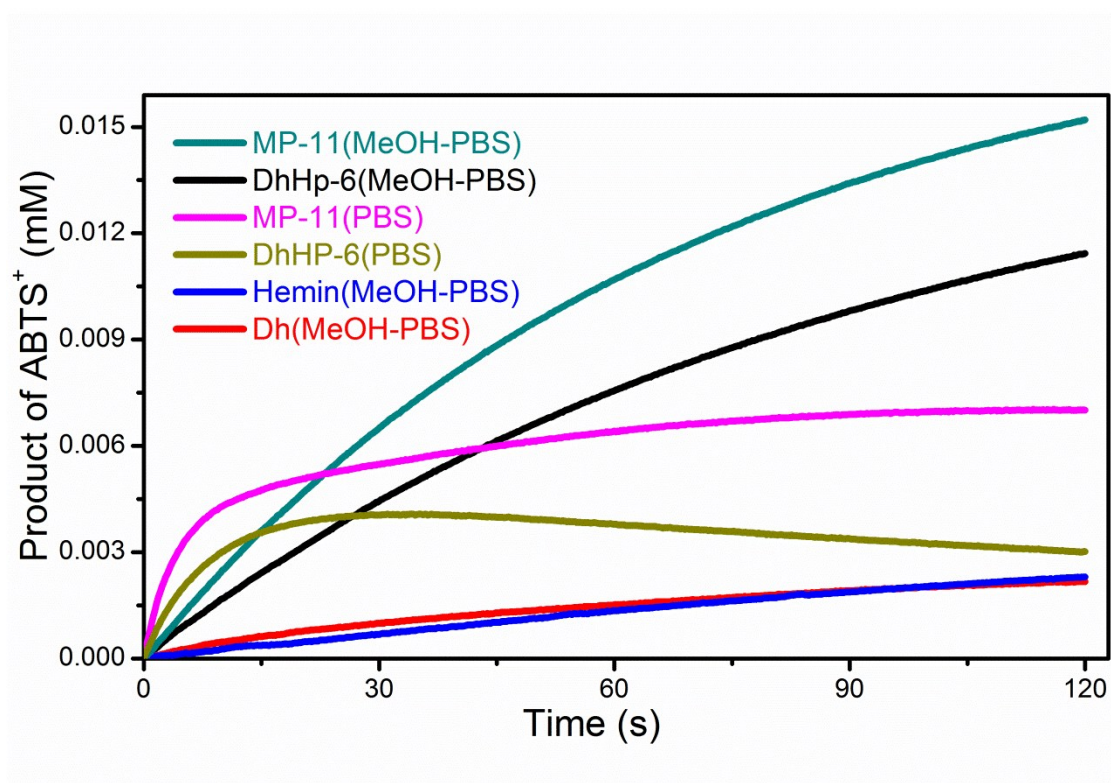

Figure S1. Time-dependent product concentration of ABTS<sup>+</sup> with various enzyme mimic as catalysts. All of the curves that marked MeOH-PBS are the methanol-PBS mixed solvent with a volume ratio of methanol equal 15%.

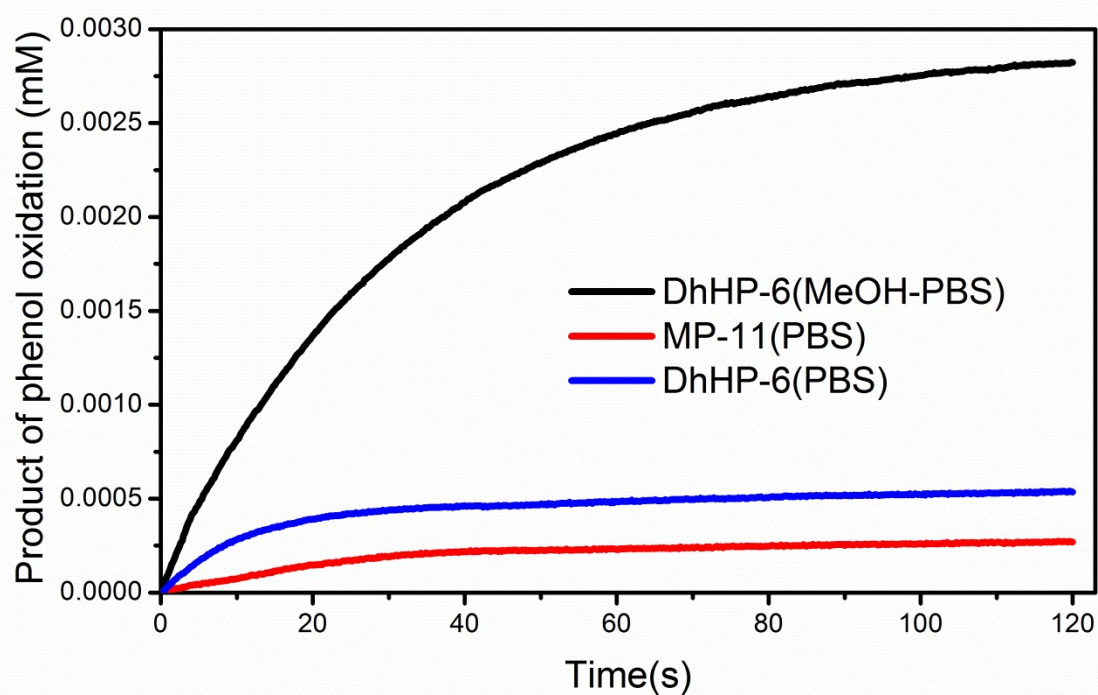

Figure S2. Time-dependent product concentration of phenol oxidation with various enzyme mimic as catalysts. The concentration of enzymes was set to be 0.01  $\mu$ M for all of the three catalytic reactions at a temperature of 30  $^{\circ}$ C.

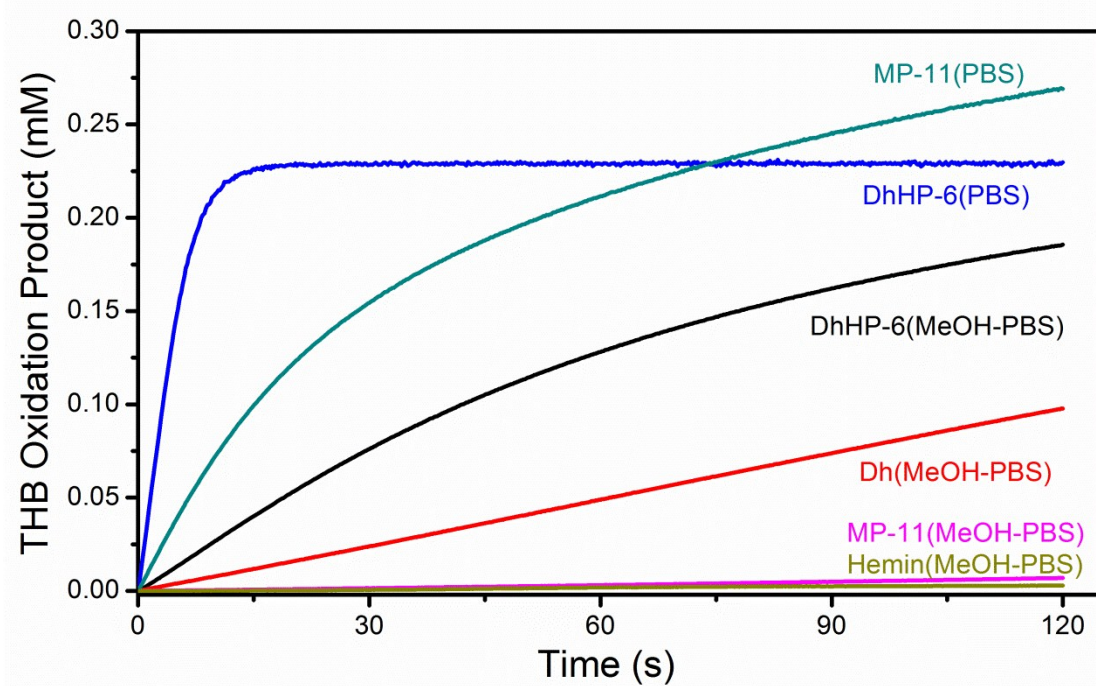

Figure S3 Time-dependent product concentration of THB oxidation with various enzyme mimics as catalysts.

Table S1 Kinetic parameters of DhHP-6 as measured using 0.02-15  $\mu$ M phenol concentrations in differing concentrations (% v/v) of organic solvents. The reaction media were set in phosphate buffer, pH 7.0. The enzyme activity was measured under standard assay conditions.

| Organic<br>c       | Kinetic parameters |       |           |             |       |           |         |       |           |          |       |           |
|--------------------|--------------------|-------|-----------|-------------|-------|-----------|---------|-------|-----------|----------|-------|-----------|
|                    | Acetone            |       |           | 1,4-Dioxane |       |           | Ethanol |       |           | Methanol |       |           |
| Solvent<br>(% v/v) | $K_m$              | $V_m$ | $V_m/K_m$ | $K_m$       | $V_m$ | $V_m/K_m$ | $K_m$   | $V_m$ | $V_m/K_m$ | $K_m$    | $V_m$ | $V_m/K_m$ |
| 20                 | 0.9                | 5.18  | 5.76      | 0.37        | 1.28  | 3.46      | 0.32    | 6.8   | 21.25     | 0.098    | 3.16  | 32.24     |
| 40                 | 0.56               | 2.15  | 3.84      | 1.83        | 4.7   | 2.57      | 0.2     | 1.49  | 7.45      | 0.1      | 2.2   | 22        |
| 60                 | --                 | --    | --        | --          | --    | --        | 0.077   | 0.5   | 6.49      | 0.067    | 0.95  | 14.18     |
| 80                 | --                 | --    | --        | --          | --    | --        | --      | --    | --        | 0.19     | 0.282 | 1.48      |

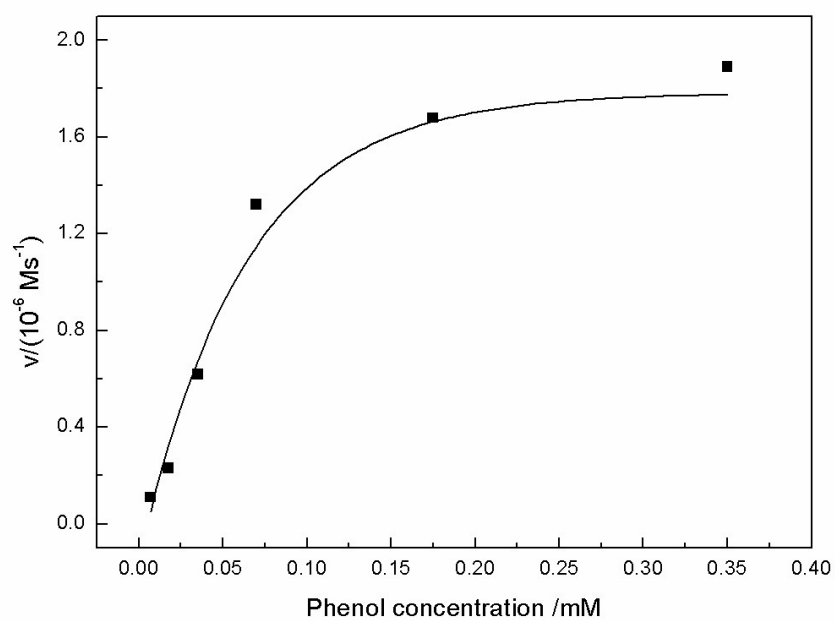

Figure S4 Steady-state kinetic assay and catalytic mechanism of DhHP-6: The concentration of  $\text{H}_2\text{O}_2$  is 1 mM and the phenol concentration is varied.

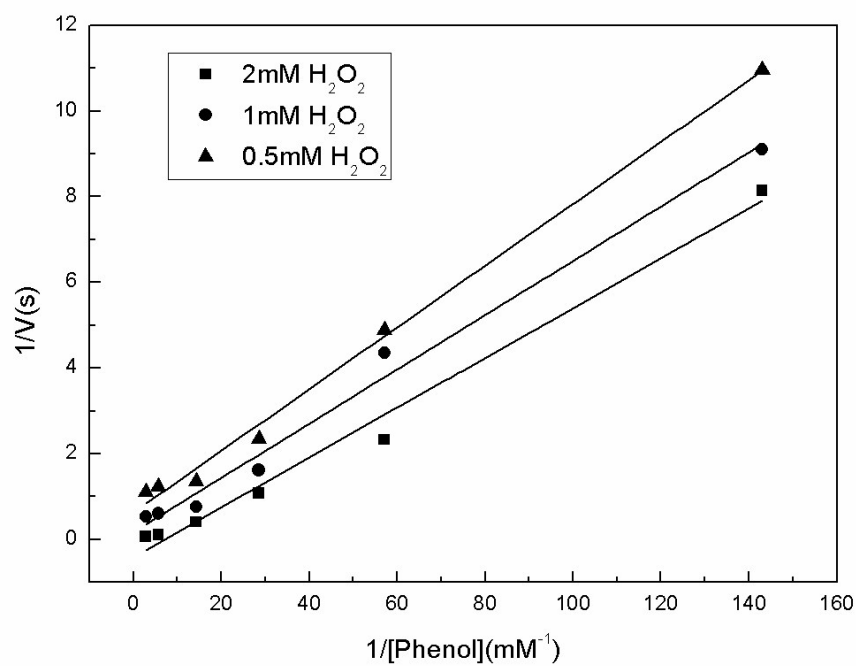

Figure S5 Double reciprocal plots of peroxidase activity of DhHP-6: initial velocity against the concentration of the substrate phenol is obtained over a range of concentrations of the second substrate  $H_2O_2$ . All test conditions was at 25 °C in a pH 7.0 PBS (0.05 M) buffer.



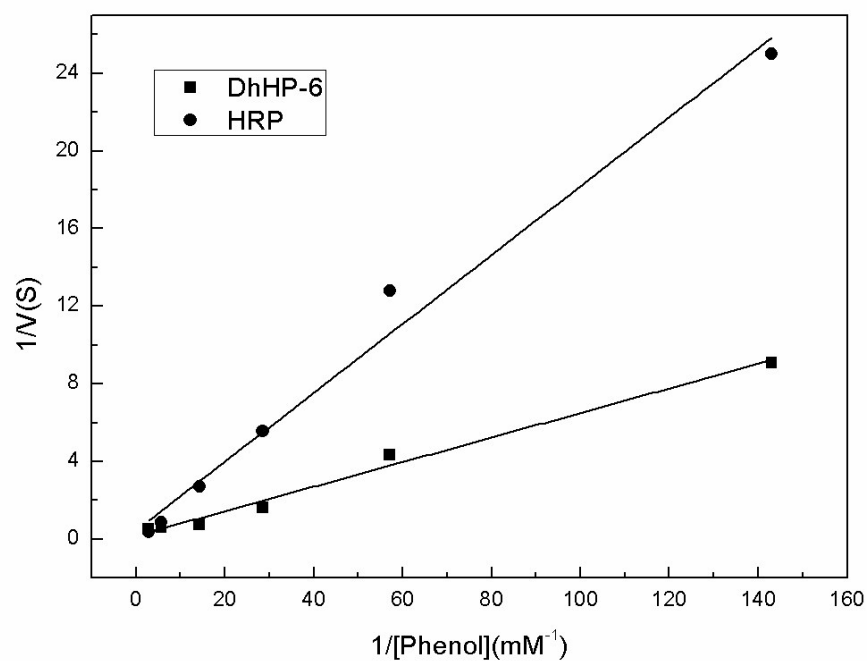

Figure S6 Double-reciprocal plots of activity of DhHP-6 and HRP at a fixed concentration of  $\text{H}_2\text{O}_2$  versus varying concentration of phenol. The test conditions of DhHP-6 was at 25 °C in a pH 7.0 PBS (0.05 M) buffer and the test conditions of HRP was at 25 °C in a pH 6.0 PBS (0.05 M).
